# Supplementary material
Source: publisher figshare collection journal article supplement (https://karger.figshare.com/ndownloader/files/15342674)
Supplement: Supplementary file 1 [file 15342674]

**Supplementary Table S1.** Hormonal slopes before and during fast feedback

| **Subject** | **1** | **2** | **3** | **4** | **5** | **6** | **Mean** | **Median** |
| --- | --- | --- | --- | --- | --- | --- | --- | --- |
| ACTH slope -3 to 0 minutes before FF-ON (fmol/L/min) | 533 | 2320 | 980 | 1370 | 380 | 440 | **1004** | 756 |
| ACTH slope 0 to 3 minutes after FF-ON (fmol/L/min) | 180 | -853 | -497 | -460 | -320 | 280 | **-278** | -390 |
| Max ACTH ∆slope (fmol/L/min) (all coincident with FF-ON) | -353 | -3173 | -1477 | -1830 | -700 | -160 | **-1282** | -1089 |
|  |  |  |  |  |  |  |  |  |
| Cortisol slope -9 to -6 minutes before FF-ON (nmol/L/min) | 4.78 | -2.21 | 15.82 | -8.28 | 4.97 | -5.89 | **1.53** | 1.29 |
| Cortisol slope -6 to -3 minutes before FF-ON (nmol/L/min) | -8.64 | 1.47 | 36.69 | -0.28 | 11.4 | -1.01 | **6.6** | 0.6 |
| Cortisol slope -3 to 0 minutes before FF-ON (nmol/L/min) | 4.1 | 22.5 | 45.4 | 12.4 | 47 | 5.4 | **22.8** | 17.5 |
| Cortisol slope 0-3 minutes at FF-ON (nmol/L/min) | 51.6 | 42.7 | 31.5 | 38.4 | 42.3 | 22.5 | **38.2** | 40.4 |
| Cortisol slope 3 to 6 minutes after FF-ON (nmol/L/min) | 8.28 | 18.02 |  |  | 8.65 | 55.6 | **22.6** | 13.3 |
| Cortisol slope 6 to 9 minutes after FF-ON (nmol/L/min) |  | 7.27 |  |  |  | 16.28 | **11.8** | 11.8 |
| Max cortisol slope observed (nmol/L/min) | 51.6 | 42.7 | 45.4 | 38.4 | 47 | 55.6 | **46.8** | 46.2 |
| Trigger cortisol slope (nmol/L/min) | 51.6 | 42.7 | 45.4 | 38.4 | 47 | 22.5 | **41.3** | 44.1 |
| Mins trigger slope to FF-ON | 0 | 0 | 3 | 0 | 3 | 0 | **1.0** | 0.0 |

Slopes are based on hormone concentrations at beginning and end of stated period. A denotes ACTH; C denotes cortisol. FF-ON is onset of fast feedback and FF-OFF is offset of fast feedback episode. All data were observed before FF-OFF. Unfilled cells reflect occurrence of FF-OFF before the stated period.
